# Supplementary material for: Germinal centre-driven maturation of B cell response to SARS-CoV-2 vaccination
Source: bioRxiv or medRxiv preprint supplement (doi:10.1101/2021.10.31.466651), 2021-11-02
Supplement: Supplementary file [file media-1.pdf]

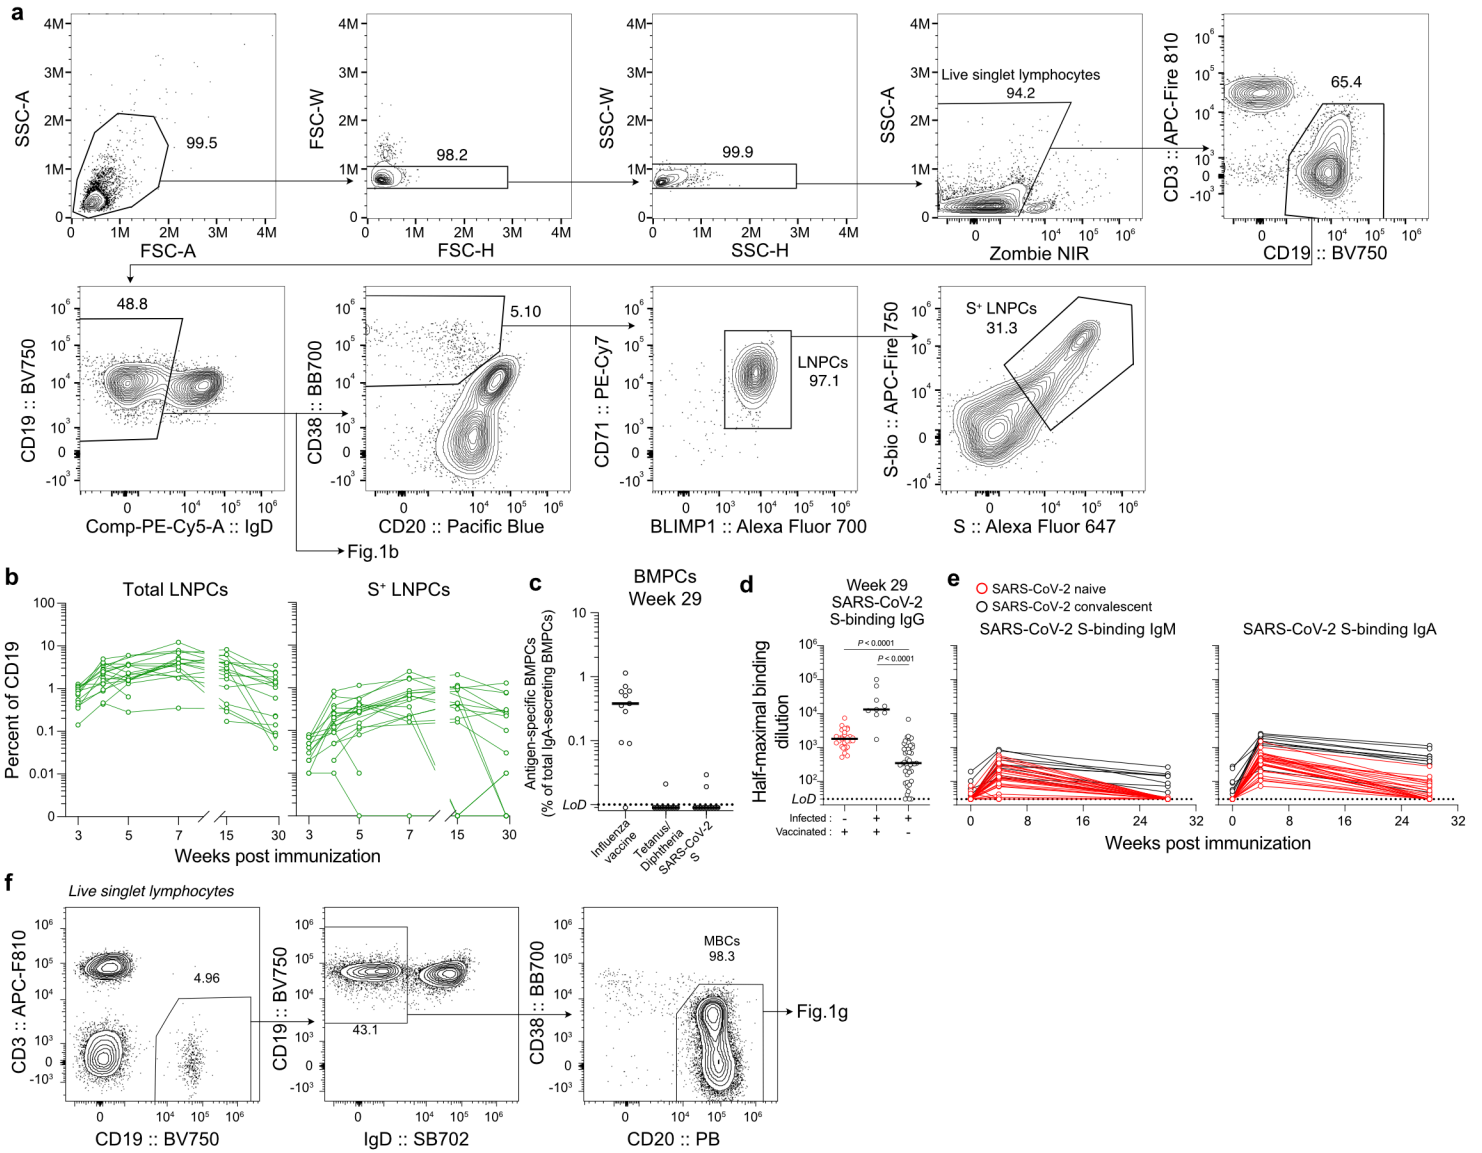

**Extended Data Figure 1. Persistence of humoral immune responses to SARS-CoV-2 mRNA vaccination.** **a**, Flow cytometry gating strategies for GC B cells (Fig. 1b) and LNPs (defined as CD19<sup>+</sup> CD3<sup>+</sup> IgD<sup>low</sup> CD20<sup>low</sup> CD38<sup>+</sup> BLIMP1<sup>+</sup> CD71<sup>+</sup> live singlet lymphocytes) in the lymph node. **b**, Kinetics of total (left) and S<sup>+</sup> LNPs (right) as gated in **a**. **c**, Frequencies of BMPCs secreting IgA antibodies specific for the indicated antigens 29 weeks after immunization. **d**, **e**, Plasma antibody titers against SARS-CoV-2 S measured by ELISA in participants without (red) and with (black) a history of SARS-CoV-2 infection in SARS-CoV-2 vaccinated (left, center) and unvaccinated (right) participants 29 weeks after the first vaccine dose or symptom onset (**d**) and in vaccinated participants over time (**e**). *P* values were determined by Kruskal-Wallis test followed by Dunn's multiple comparison test between unvaccinated and both vaccinated groups (**d**), and by two-sided Mann-Whitney test (**e**). Horizontal lines indicate median values in **c** and **e**. **f**, Flow cytometry gating strategies for MBCs (CD19<sup>+</sup> CD3<sup>+</sup> IgD<sup>low</sup> CD20<sup>+</sup> CD38<sup>+</sup> live singlet lymphocytes) and S<sup>+</sup> MBCs (Fig. 1g) in blood.

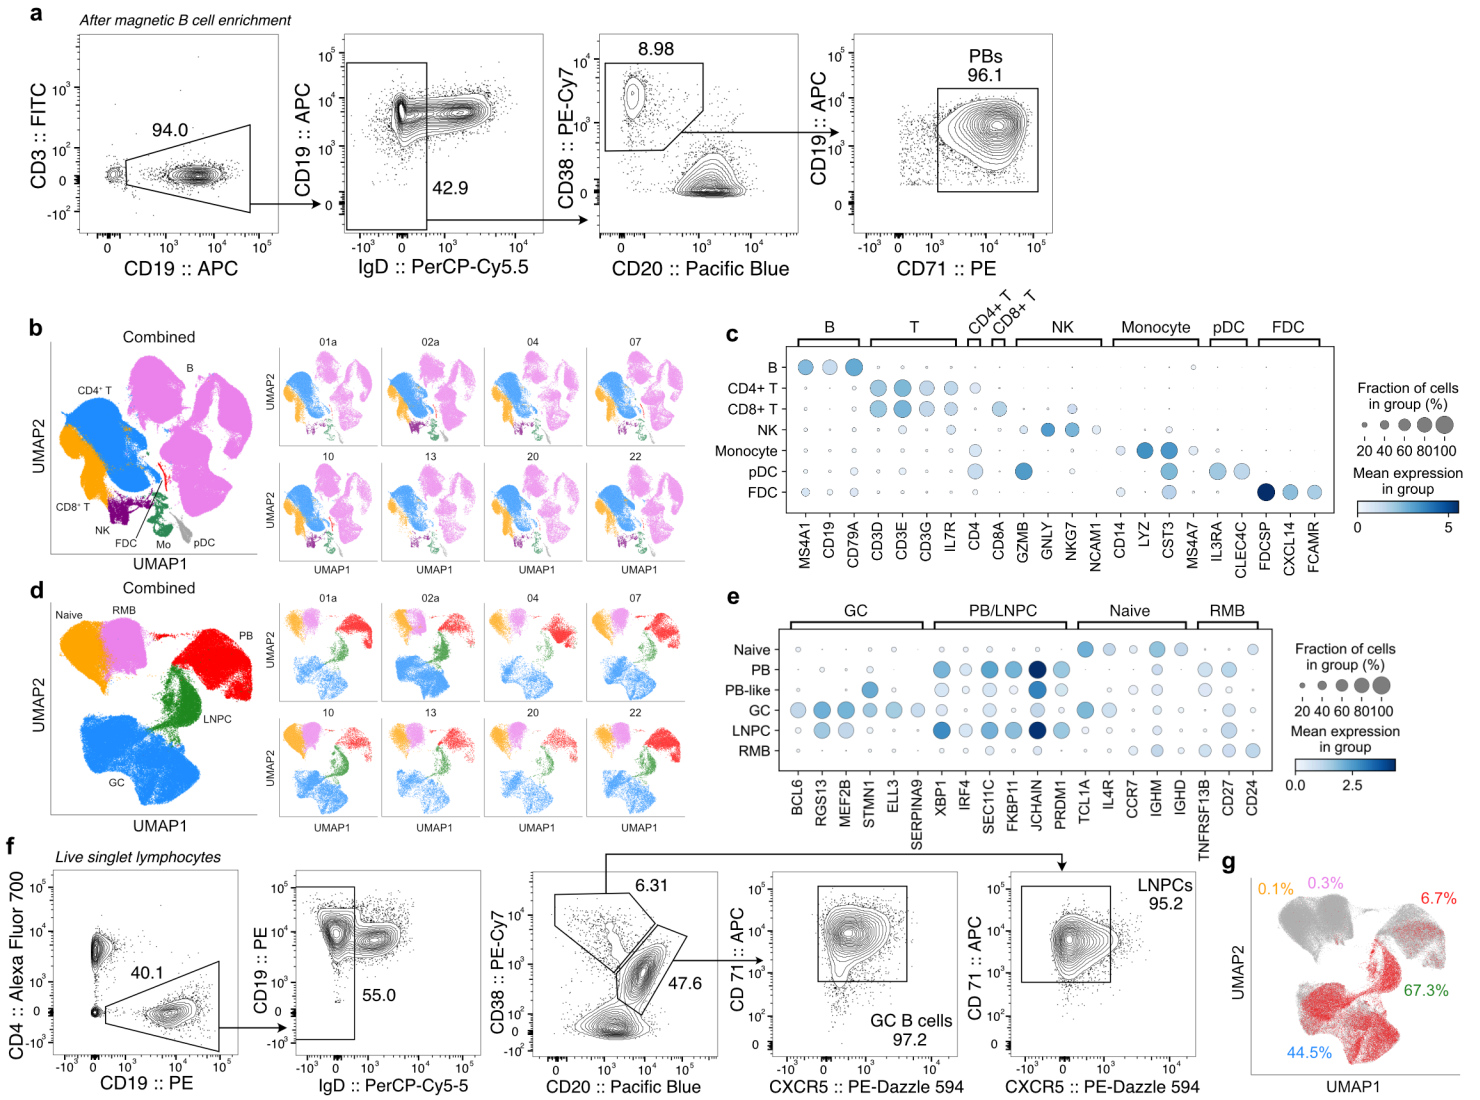

**Extended Data Figure 2. Identification of SARS-CoV-2 S-binding B cell clones in the lymph node.** **a**, Flow cytometry gating strategies for sorting PBs (defined as  $CD19^+ CD3^- IgD^{low} CD20^{low} CD38^+ CD71^+$  live singlet lymphocytes) from blood. **b**, **d** UMAPs of scRNA-seq data from PBs sorted from blood and FNA of draining axillary lymph nodes (**b**), and UMAPs of B cell scRNA-seq clusters (**d**). **c**, **e**, Dot plots for the marker genes used for identifying annotated clusters. **f**, Flow cytometry gating strategies for sorting GC B cells ( $CD19^+ CD4^- IgD^{low} CD20^+ CD38^{int} CXCR5^{high} CD71^+$  live singlet lymphocytes) and LNPCs ( $CD19^+ CD4^- IgD^{low} CD20^{low} CD38^+ CXCR5^{low} CD71^+$  live singlet lymphocytes) from FNAs. **g**, Visualization of SARS-CoV-2 S-binding clones from all participants on integrated UMAP of B cell clusters. Percentages are of SARS-CoV-2 S-binding clones within GC B cells (blue), LNPCs (green), PBs (red), RMBs (pink) or naive B cells (yellow).

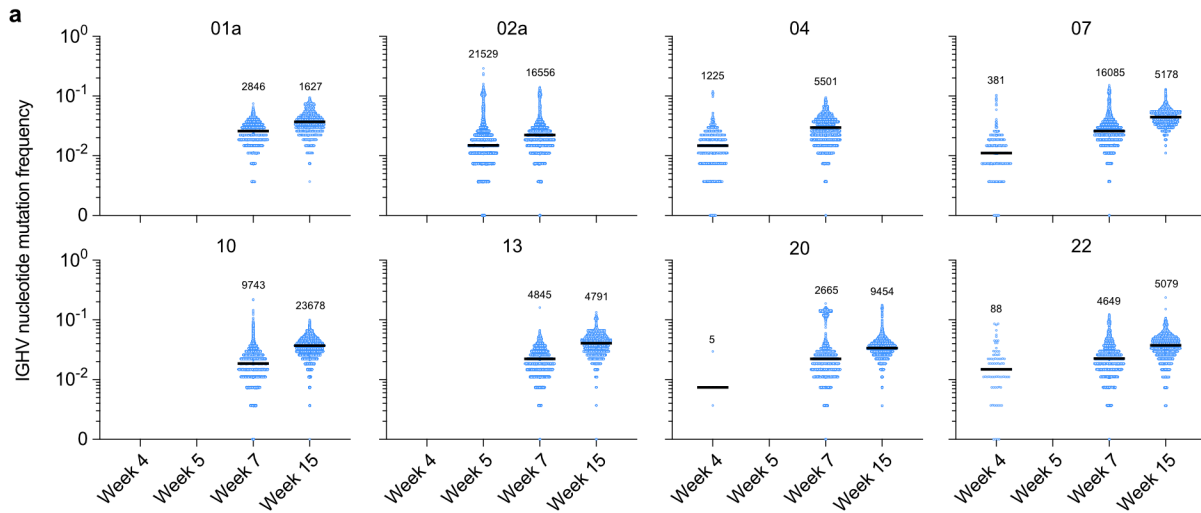

**Extended Data Figure 3. Maturation of SARS-CoV-2 S-binding B cells in the lymph node.**  
**a,** Comparison of *IGHV* nucleotide mutation frequency of SARS-CoV-2 S-binding GC B cells in each participant at the indicated time points. Horizontal lines represent median values.

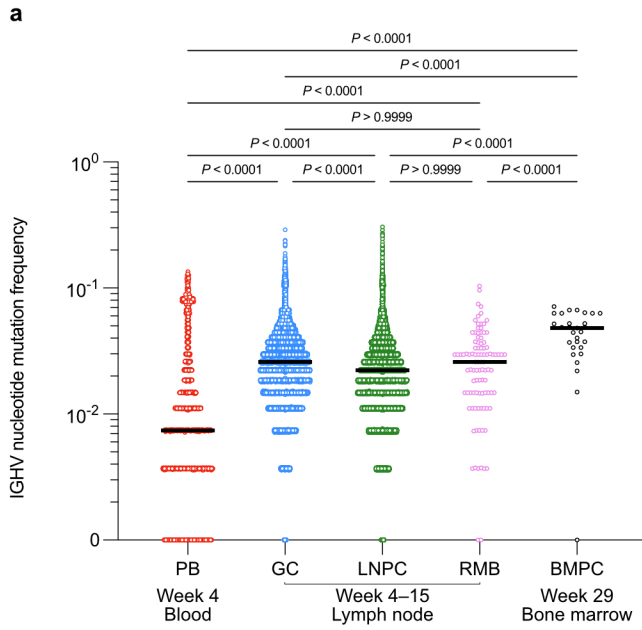

**Extended Data Figure 4. Evolution of B cell clones induced by SARS-CoV-2 vaccination.**  
**a**, Comparison of *IGHV* nucleotide mutation frequency of each B cell subsets. Horizontal lines represent median values. *P* values are determined by Kruskal-Wallis test followed by Dunn's multiple comparison test.

## Extended Data Table 1. Demographics of participants

| Variable                                                                  | SARS-CoV-2 mRNA vaccination |                       |                            |                             | Variable                                      | Convalescent (N=48)<br>N (%) |
|---------------------------------------------------------------------------|-----------------------------|-----------------------|----------------------------|-----------------------------|-----------------------------------------------|------------------------------|
|                                                                           | Total (N=43)<br>N (%)       | Blood (N=42)<br>N (%) | Lymph node (N=15)<br>N (%) | Bone marrow (N=11)<br>N (%) |                                               |                              |
| <b>Age (median [range])</b>                                               | 38 (28-73)                  | 37.5 (28-73)          | 37 (28-52)                 | 36 (28-48)                  | <b>Age (median [range])</b>                   | 50 (21-69)                   |
| <b>Sex</b>                                                                |                             |                       |                            |                             | <b>Sex</b>                                    |                              |
| Female                                                                    | 21 (48.8)                   | 20 (47.6)             | 7 (53.8)                   | 6 (54.5)                    | Female                                        | 23 (47.9)                    |
| Male                                                                      | 22 (51.2)                   | 22 (52.4)             | 6 (46.2)                   | 5 (45.5)                    | Male                                          | 25 (52.1)                    |
| <b>Race</b>                                                               |                             |                       |                            |                             | <b>Race/Ethnicity</b>                         |                              |
| White                                                                     | 34 (79.1)                   | 34 (81)               | 12 (80)                    | 11 (100)                    | White                                         | 47 (97.9)                    |
| Black                                                                     | 6 (14)                      | 6 (14.3)              | 2 (13.3)                   | 0 (0)                       | Black                                         | 0 (0)                        |
| Asian                                                                     | 1 (2.3)                     | 0 (0)                 | 1 (6.7)                    | 0 (0)                       | Asian                                         | 1 (2.1)                      |
| Other                                                                     | 2 (4.7)                     | 2 (4.8)               | 0 (0)                      | 0 (0)                       | Hispanic                                      | 0 (0)                        |
| <b>Ethnicity</b>                                                          |                             |                       |                            |                             |                                               |                              |
| Not of Hispanic, Latinx, or Spanish origin                                | 41 (95.3)                   | 40 (95.2)             | 14 (93.3)                  | 10 (90.9)                   |                                               |                              |
| Hispanic, Latinx, Spanish origin                                          | 2 (4.7)                     | 2 (4.8)               | 1 (6.7)                    | 1 (9.1)                     |                                               |                              |
| <b>BMI (media [range])</b>                                                | 26.8 (21.4-67.4)            | 26.9 (21.4-67.4)      | 24.1 (21.4-40.1)           | 23.9 (21.4-40.1)            |                                               |                              |
| <b>Comorbidities</b>                                                      |                             |                       |                            |                             | <b>Comorbidities</b>                          |                              |
| Lung disease                                                              | 1 (2.3)                     | 1 (2.4)               | 0 (0)                      | 0 (0)                       | Asthma                                        | 10 (20.8)                    |
| Diabetes mellitus                                                         | 0 (0)                       | 0 (0)                 | 0 (0)                      | 0 (0)                       | Other lung disease                            | 0 (0)                        |
| Hypertension                                                              | 7 (16.3)                    | 6 (14.3)              | 2 (13.3)                   | 1 (9.1)                     | Heart disease                                 | 0 (0)                        |
| Cardiovascular                                                            | 0 (0)                       | 0 (0)                 | 0 (0)                      | 0 (0)                       | Hypertension                                  | 7 (14.6)                     |
| Liver disease                                                             | 0 (0)                       | 0 (0)                 | 0 (0)                      | 0 (0)                       | Diabetes mellitus                             | 3 (6.3)                      |
| Chronic kidney disease                                                    | 0 (0)                       | 0 (0)                 | 0 (0)                      | 0 (0)                       | Cancer                                        | 6 (12.5)                     |
| Cancer on chemotherapy                                                    | 0 (0)                       | 0 (0)                 | 0 (0)                      | 0 (0)                       | Autoimmune disease                            | 4 (8.3)                      |
| Hematological malignancy                                                  | 0 (0)                       | 0 (0)                 | 0 (0)                      | 0 (0)                       | Hyperlipidaemia                               | 2 (4.2)                      |
| Pregnancy                                                                 | 0 (0)                       | 0 (0)                 | 0 (0)                      | 0 (0)                       | GERD                                          | 5 (10.4)                     |
| Neurological                                                              | 0 (0)                       | 0 (0)                 | 0 (0)                      | 0 (0)                       | Other                                         | 16 (33.3)                    |
| HIV                                                                       | 0 (0)                       | 0 (0)                 | 0 (0)                      | 0 (0)                       | Solid Organ Transplant                        | 1 (2.1)                      |
| Hyperlipidemia                                                            | 1 (2.3)                     | 1 (2.4)               | 0 (0)                      | 0 (0)                       |                                               |                              |
| Gastroesophageal reflux disease                                           | -                           | -                     | -                          | -                           |                                               |                              |
| Autoimmune disease                                                        | -                           | -                     | -                          | -                           |                                               |                              |
| Solid organ transplant recipient                                          | 0 (0)                       | 0 (0)                 | 0 (0)                      | 0 (0)                       |                                               |                              |
| Bone marrow transplant recipient                                          | 0 (0)                       | 0 (0)                 | 0 (0)                      | 0 (0)                       |                                               |                              |
| <b>Confirmed SARS-CoV-2 infection</b>                                     | 13 (30.2)                   | 13 (31)               | 0 (0)                      | 0 (0)                       | <b>Hospitalized for treatment of COVID-19</b> | 3 (6.3)                      |
| Time from SARS-CoV-2 infection to baseline visit in days (median [range]) | 234 (70-370)                | 234 (70-370)          | -                          | -                           |                                               |                              |

**Extended Data Table 2. Vaccine side effects**

| Variable                                                  | Total N=43<br>N (%) | Total N=43<br>N (%) |
|-----------------------------------------------------------|---------------------|---------------------|
|                                                           | <b>First dose</b>   | <b>Second dose</b>  |
| None                                                      | 2 (4.7)             | 0 (0)               |
| Chills                                                    | 9 (20.9)            | 18 (41.9)           |
| Fever                                                     | 6 (14)              | 12 (27.9)           |
| Headache                                                  | 10 (23.3)           | 16 (37.2)           |
| Injection site pain/redness/swelling                      | 37 (86)             | 39 (90.7)           |
| Muscle or joint pain                                      | 10 (23.3)           | 25 (58.1)           |
| Fatigue                                                   | 13 (30.2)           | 27 (62.8)           |
| <b>Duration of side effects in hours (median [range])</b> |                     |                     |
| Chills                                                    | 18 (6-72)           | 24 (0.2-48)         |
| Fever                                                     | 8 (3-72)            | 30 (1-48)           |
| Headache                                                  | 36 (6-120)          | 24 (4-72)           |
| Injection site pain                                       | 48 (0.2-168)        | 48 (2-144)          |
| Muscle or joint pain                                      | 24 (3-72)           | 24 (1-48)           |
| Fatigue                                                   | 48 (12-120)         | 24 (3-144)          |

**Extended Data Table 3. Frequencies of total and SARS-CoV-2 S-binding GC B cells and LNPCs in draining axillary lymph nodes**

| Participant | LN # | Total GC B cells (% of CD19) |        |        |        |         |         | SARS-CoV-2 S-binding GC B cells (% of CD19) |        |        |        |         |         |  |
|-------------|------|------------------------------|--------|--------|--------|---------|---------|---------------------------------------------|--------|--------|--------|---------|---------|--|
|             |      | Week 3                       | Week 4 | Week 5 | Week 7 | Week 15 | Week 29 | Week 3                                      | Week 4 | Week 5 | Week 7 | Week 15 | Week 29 |  |
| 01a         | 1    | 15.25                        | 13.69  | 11.14  | 31.67  | 29.13   | 14.37   | 3.23                                        | 5.41   | 4.01   | 13.75  | 18.06   | 8.00    |  |
| 02a         | 1    | 8.28                         | 34.16  | 44.92  | 21.90  | 7.17    | 0.85    | 1.36                                        | 9.66   | 11.55  | 5.98   | 0.01    | 0.06    |  |
|             | 2    |                              | 14.08  | 13.54  | 23.13  |         |         |                                             | 4.66   | 3.85   | 9.33   |         |         |  |
| 04          | 1    | 4.71                         | 14.02  | 11.21  | 43.94  | 3.75    | 0.38    | 0.57                                        | 2.84   | 5.59   | 6.37   | 0.70    | 0.00    |  |
|             | 2    |                              |        |        |        | 1.09    | 0.41    |                                             |        |        |        | 0.03    | 0.00    |  |
| 07          | 1    | 21.14                        | 19.68  | 11.48  | 39.22  | 28.93   | 28.10   | 4.59                                        | 4.92   | 3.87   | 14.55  | 19.92   | 14.77   |  |
| 08          | 1    | 9.91                         | 1.31   | 3.99   | 12.15  |         | 31.34   | 1.21                                        | 0.41   | 0.91   | 4.21   |         | 23.33   |  |
| 10          | 1    | 7.72                         | 5.92   | 2.82   | 7.34   | 19.33   | 19.41   | 1.10                                        | 1.47   | 0.90   | 3.10   | 14.19   | 15.37   |  |
|             | 2    |                              | 5.70   | 3.40   | 4.28   | 7.14    | 9.19    |                                             | 1.36   | 1.04   | 1.05   | 2.79    | 5.90    |  |
| 13          | 1    | 14.99                        | 8.69   | 7.23   | 16.02  | 20.21   | 0.77    | 3.53                                        | 3.00   | 2.14   | 3.70   | 10.03   | 0.00    |  |
| 15          | 1    | 13.06                        | 26.89  | 44.56  |        |         |         | 2.96                                        | 8.01   | 9.58   |        |         |         |  |
|             | 2    |                              | 0.23   | 0.61   |        |         |         |                                             | 0.01   | 0.02   |        |         |         |  |
| 16          | 1    | 5.20                         | 7.61   | 17.04  |        | 5.82    | 4.40    | 0.74                                        | 1.50   | 3.34   |        | 2.57    | 1.48    |  |
|             | 2    |                              | 1.22   | 7.44   |        | 9.61    | 3.64    |                                             | 0.24   | 1.84   |        | 5.81    | 1.06    |  |
| 20          | 1    | 0.41                         | 7.49   | 2.10   | 0.52   | 0.47    | 0.71    | 0.03                                        | 3.07   | 0.31   | 0.04   | 0.04    | 0.02    |  |
|             | 2    |                              | 7.79   | 3.36   | 13.67  | 16.93   | 20.23   |                                             | 1.28   | 0.72   | 4.43   | 11.08   | 10.56   |  |
| 21          | 1    |                              | 20.18  |        | 14.50  |         | 7.03    |                                             | 5.92   |        | 5.20   |         | 3.33    |  |
| 22          | 1    | 24.69                        | 20.63  | 19.66  | 25.86  | 22.01   | 0.72    | 4.44                                        | 5.35   | 4.92   | 7.33   | 9.69    | 0.00    |  |
| 26          | 1    |                              |        |        |        |         | 1.69    |                                             |        |        |        |         | 0.29    |  |
| 28          | 1    | 6.40                         | 6.25   |        |        | 12.82   | 9.46    | 1.12                                        | 1.16   |        |        | 7.26    | 4.73    |  |
| 43          | 1    | 29.01                        | 29.38  | 26.09  | 29.43  | 35.19   |         | 4.43                                        | 9.42   | 6.28   | 15.26  | 15.38   |         |  |

  

| Participant | LN # | Total LNPCs (% of CD19) |        |        |        |         |         | SARS-CoV-2 S-binding LNPCs (% of CD19) |        |        |        |         |         |  |
|-------------|------|-------------------------|--------|--------|--------|---------|---------|----------------------------------------|--------|--------|--------|---------|---------|--|
|             |      | Week 3                  | Week 4 | Week 5 | Week 7 | Week 15 | Week 29 | Week 3                                 | Week 4 | Week 5 | Week 7 | Week 15 | Week 29 |  |
| 01a         | 1    | 0.77                    | 4.96   | 6.00   | 6.82   | 8.23    | 2.33    | 0.07                                   | 0.84   | 1.15   | 1.61   | 2.04    | 0.78    |  |
| 02a         | 1    | 0.35                    | 2.47   | 3.52   | 3.20   | 0.43    | 0.22    | 0.01                                   | 0.20   | 0.40   | 0.36   | 0.00    | 0.00    |  |
|             | 2    |                         | 2.30   | 3.74   | 3.91   |         |         |                                        | 0.25   | 0.28   | 0.54   |         |         |  |
| 04          | 1    | 0.88                    | 1.29   | 1.57   | 2.67   | 0.29    | 0.08    | 0.05                                   | 0.09   | 0.43   | 0.20   | 0.00    | 0.01    |  |
|             | 2    |                         |        |        |        | 0.17    | 0.14    |                                        |        |        |        | 0.00    | 0.01    |  |
| 07          | 1    | 0.97                    | 2.74   | 1.73   | 3.97   | 2.02    | 1.87    | 0.07                                   | 0.26   | 0.26   | 0.67   | 0.32    | 0.22    |  |
| 08          | 1    | 1.07                    | 2.18   | 1.53   | 4.84   |         | 3.49    | 0.07                                   | 0.09   | 0.15   | 0.74   |         | 1.30    |  |
| 10          | 1    | 0.71                    | 4.08   | 2.31   | 3.92   | 4.02    | 2.42    | 0.04                                   | 0.34   | 0.33   | 0.86   | 1.06    | 0.76    |  |
|             | 2    |                         | 2.83   | 3.51   | 1.75   | 1.08    | 1.40    |                                        | 0.18   | 0.40   | 0.16   | 0.19    | 0.31    |  |
| 13          | 1    | 0.39                    | 0.94   | 1.57   | 5.25   | 3.02    | 0.04    | 0.02                                   | 0.21   | 0.30   | 0.64   | 0.44    | 0.00    |  |
| 15          | 1    | 1.26                    | 1.27   | 3.60   |        |         |         | 0.08                                   | 0.12   | 0.29   |        |         |         |  |
|             | 2    |                         | 1.79   | 0.64   |        |         |         |                                        | 0.10   | 0.01   |        |         |         |  |
| 16          | 1    | 0.47                    | 0.88   | 2.24   |        | 1.68    | 0.60    | 0.02                                   | 0.05   | 0.12   |        | 0.16    | 0.03    |  |
|             | 2    |                         | 0.43   | 1.31   |        | 2.91    | 1.06    |                                        | 0.02   | 0.11   |        | 0.43    | 0.10    |  |
| 20          | 1    | 0.14                    | 0.46   | 0.28   | 0.35   | 0.34    | 0.09    | 0.01                                   | 0.01   | 0.00   | 0.00   | 0.00    | 0.00    |  |
|             | 2    |                         | 1.73   | 1.62   | 4.01   | 2.48    | 1.32    |                                        | 0.05   | 0.08   | 0.22   | 0.42    | 0.29    |  |
| 21          | 1    |                         | 3.42   |        | 12.18  |         | 1.53    |                                        | 0.38   |        | 1.70   |         | 0.25    |  |
| 22          | 1    | 1.01                    | 2.92   | 5.91   | 7.84   | 5.84    | 0.07    | 0.03                                   | 0.16   | 0.30   | 0.77   | 0.82    | 0.00    |  |
| 26          | 1    |                         |        |        |        |         | 0.23    |                                        |        |        |        |         | 0.00    |  |
| 28          | 1    | 0.54                    | 1.54   |        |        | 6.26    | 1.29    | 0.03                                   | 0.13   |        |        | 1.15    | 0.25    |  |
| 43          | 1    | 1.14                    | 3.85   | 3.66   | 7.75   | 3.63    |         | 0.05                                   | 0.63   | 0.55   | 2.44   | 0.93    |         |  |

**Extended Data Table 4. Frequencies of CD14<sup>+</sup> cells in lymph node samples**

| Participant | LN # | CD14 (% of live singlet) |        |        |        |         |         |
|-------------|------|--------------------------|--------|--------|--------|---------|---------|
|             |      | Week 3                   | Week 4 | Week 5 | Week 7 | Week 15 | Week 29 |
| 01a         | 1    | 0.21                     | 0.06   | 0.15   | 0.15   | 0.16    | 0.21    |
| 02a         | 1    | 0.16                     | 0.17   | 0.07   | 0.25   | 0.17    | 0.30    |
|             | 2    |                          | 0.14   | 0.14   | 0.71   |         |         |
| 04          | 1    | 0.19                     | 0.37   | 0.72   | 0.14   | 1.00    | 0.16    |
|             | 2    |                          |        |        |        | 0.33    | 0.25    |
| 07          | 1    | 0.19                     | 0.15   | 0.42   | 0.66   | 0.04    | 4.38    |
| 08          | 1    | 0.27                     | 0.17   | 0.34   | 0.81   |         | 1.01    |
| 10          | 1    | 0.22                     | 0.07   | 0.08   | 0.21   | 0.03    | 0.23    |
|             | 2    |                          | 0.09   | 0.05   | 0.13   | 0.03    | 0.26    |
| 13          | 1    | 0.57                     | 0.34   | 0.43   | 0.33   | 1.63    | 1.04    |
| 15          | 1    | 0.07                     | 0.19   | 0.08   |        |         |         |
|             | 2    |                          | 0.14   | 0.24   |        |         |         |
| 16          | 1    | 0.26                     | 0.14   | 0.06   |        | 1.21    | 0.50    |
|             | 2    |                          | 0.11   | 0.14   |        | 0.51    | 0.32    |
| 20          | 1    | 0.21                     | 0.15   | 0.29   | 0.41   | 0.84    | 0.11    |
|             | 2    |                          | 0.11   | 0.16   | 0.11   | 0.29    | 0.16    |
| 21          | 1    |                          | 0.13   |        | 0.11   |         | 0.51    |
| 22          | 1    | 0.18                     | 0.16   | 0.20   | 0.36   | 0.28    | 0.24    |
| 26          | 1    |                          |        |        |        |         | 0.03    |
| 28          | 1    | 0.14                     | 0.22   |        |        | 0.66    | 0.66    |
| 43          | 1    | 0.52                     | 0.32   | 0.98   | 0.09   | 0.01    |         |



**Extended Data Table 5. Cell counts and frequencies of overall and B cell clusters in scRNA-seq of PBs sorted from blood and FNA from lymph nodes**

| Sample                | Overall cluster | Cell count<br>(% of whole cells) |
|-----------------------|-----------------|----------------------------------|
| PBs sorted from blood | B               | 27420 (96.5%)                    |
|                       | CD4+ T          | 35 (0.1%)                        |
|                       | CD8+ T          | 87 (0.3%)                        |
|                       | NK              | 730 (2.6%)                       |
|                       | Monocyte        | 142 (0.5%)                       |
|                       | pDC             | 6 (0%)                           |
| Lymph node            | FDC             | 0 (0%)                           |
|                       | B               | 139287 (48.1%)                   |
|                       | CD4+ T          | 108647 (37.5%)                   |
|                       | CD8+ T          | 29986 (10.4%)                    |
|                       | NK              | 4983 (1.7%)                      |
|                       | Monocyte        | 4260 (1.5%)                      |
| Combined              | pDC             | 2164 (0.7%)                      |
|                       | FDC             | 349 (0.1%)                       |
|                       | B               | 166707 (52.4%)                   |
|                       | CD4+ T          | 108682 (34.2%)                   |
|                       | CD8+ T          | 30073 (9.5%)                     |
|                       | NK              | 5713 (1.8%)                      |
|                       | Monocyte        | 4402 (1.4%)                      |
|                       | pDC             | 2170 (0.7%)                      |
|                       | FDC             | 349 (0.1%)                       |

| Participants | B cell cluster | Total cells<br>(each B cell cluster out of whole B cells) | SARS-CoV-2 S-binding cells<br>(S-binding cells out of total cells within each cluster) |
|--------------|----------------|-----------------------------------------------------------|----------------------------------------------------------------------------------------|
| 01a          | GC             | 4050 (25.5%)                                              | 2258 (55.8%)                                                                           |
|              | LNPC           | 1113 (7%)                                                 | 891 (80.1%)                                                                            |
|              | Naïve          | 2034 (12.8%)                                              | 0 (0%)                                                                                 |
|              | PB             | 6183 (38.9%)                                              | 424 (6.9%)                                                                             |
|              | PB-like        | 2 (0%)                                                    | 0 (0%)                                                                                 |
|              | RMB            | 2495 (15.7%)                                              | 15 (0.6%)                                                                              |
| 02a          | GC             | 17869 (56.5%)                                             | 7663 (42.9%)                                                                           |
|              | LNPC           | 3101 (9.8%)                                               | 2285 (73.7%)                                                                           |
|              | Naïve          | 4161 (13.2%)                                              | 2 (0%)                                                                                 |
|              | PB             | 1837 (5.8%)                                               | 246 (13.4%)                                                                            |
|              | PB-like        | 1 (0%)                                                    | 0 (0%)                                                                                 |
|              | RMB            | 4671 (14.8%)                                              | 32 (0.7%)                                                                              |
| 04           | GC             | 3694 (30%)                                                | 1602 (43.4%)                                                                           |
|              | LNPC           | 392 (3.2%)                                                | 109 (27.8%)                                                                            |
|              | Naïve          | 2059 (16.7%)                                              | 1 (0%)                                                                                 |
|              | PB             | 4363 (35.5%)                                              | 212 (4.9%)                                                                             |
|              | PB-like        | 0 (0%)                                                    | -                                                                                      |
|              | RMB            | 1788 (14.5%)                                              | 5 (0.3%)                                                                               |
| 07           | GC             | 6313 (37.1%)                                              | 3695 (58.5%)                                                                           |
|              | LNPC           | 716 (4.2%)                                                | 492 (68.7%)                                                                            |
|              | Naïve          | 3314 (19.5%)                                              | 0 (0%)                                                                                 |
|              | PB             | 3667 (21.6%)                                              | 160 (4.4%)                                                                             |
|              | PB-like        | 9 (0.1%)                                                  | 0 (0%)                                                                                 |
|              | RMB            | 2989 (17.6%)                                              | 10 (0.3%)                                                                              |
| 10           | GC             | 8505 (24.2%)                                              | 3099 (36.4%)                                                                           |
|              | LNPC           | 2419 (6.9%)                                               | 1424 (58.9%)                                                                           |
|              | Naïve          | 13382 (38%)                                               | 13 (0.1%)                                                                              |
|              | PB             | 1497 (4.3%)                                               | 59 (3.9%)                                                                              |
|              | PB-like        | 2 (0%)                                                    | 0 (0%)                                                                                 |
|              | RMB            | 9365 (26.6%)                                              | 18 (0.2%)                                                                              |
| 13           | GC             | 3635 (29.7%)                                              | 1385 (38.1%)                                                                           |
|              | LNPC           | 907 (7.4%)                                                | 671 (74%)                                                                              |
|              | Naïve          | 2637 (21.5%)                                              | 6 (0.2%)                                                                               |
|              | PB             | 1861 (15.2%)                                              | 38 (2%)                                                                                |
|              | PB-like        | 3 (0%)                                                    | 0 (0%)                                                                                 |
|              | RMB            | 3211 (26.2%)                                              | 1 (0%)                                                                                 |
| 20           | GC             | 3256 (27.2%)                                              | 1641 (50.4%)                                                                           |
|              | LNPC           | 659 (5.5%)                                                | 363 (55.1%)                                                                            |
|              | Naïve          | 3100 (25.9%)                                              | 0 (0%)                                                                                 |
|              | PB             | 1178 (9.9%)                                               | 23 (2%)                                                                                |
|              | PB-like        | 0 (0%)                                                    | -                                                                                      |
|              | RMB            | 3766 (31.5%)                                              | 3 (0.1%)                                                                               |
| 22           | GC             | 5281 (26.9%)                                              | 2087 (39.5%)                                                                           |
|              | LNPC           | 1576 (8%)                                                 | 1089 (69.1%)                                                                           |
|              | Naïve          | 2072 (10.6%)                                              | 0 (0%)                                                                                 |
|              | PB             | 6633 (33.8%)                                              | 660 (10%)                                                                              |
|              | PB-like        | 2 (0%)                                                    | 0 (0%)                                                                                 |
|              | RMB            | 4036 (20.6%)                                              | 14 (0.3%)                                                                              |
| Combined     | GC             | 52603 (33.8%)                                             | 23430 (44.5%)                                                                          |
|              | LNPC           | 10883 (7%)                                                | 7324 (67.3%)                                                                           |
|              | Naïve          | 32759 (21%)                                               | 22 (0.1%)                                                                              |
|              | PB             | 27219 (17.5%)                                             | 1822 (6.7%)                                                                            |
|              | PB-like        | 19 (0%)                                                   | 0 (0%)                                                                                 |
|              | RMB            | 32321 (20.7%)                                             | 98 (0.3%)                                                                              |

**Extended Data Table 6. Description of monoclonal antibodies derived from GC B cells and LNPCs**

|                     |           | 01a (N=145)<br>N (%) | 02a (N=410)<br>N (%) | 04 (N=124)<br>N (%) | 07 (N=201)<br>N (%) | 10 (N=249)<br>N (%) | 13 (N=108)<br>N (%) | 20 (N=99)<br>N (%) | 22 (N=167)<br>N (%) |
|---------------------|-----------|----------------------|----------------------|---------------------|---------------------|---------------------|---------------------|--------------------|---------------------|
| Heavy chain isotype | IGHG      | 109 (75.2%)          | 387 (94.4%)          | 102 (82.3%)         | 146 (72.6%)         | 200 (80.3%)         | 102 (94.4%)         | 90 (90.9%)         | 144 (86.2%)         |
|                     | IGHA      | 35 (24.1%)           | 11 (2.7%)            | 15 (12.1%)          | 54 (26.9%)          | 43 (17.3%)          | 5 (4.6%)            | 6 (6.1%)           | 22 (13.2%)          |
|                     | IGHM      | 1 (0.7%)             | 11 (2.7%)            | 7 (5.6%)            | 1 (0.5%)            | 2 (0.8%)            | 1 (0.9%)            | 3 (3%)             | 1 (0.6%)            |
|                     | IGHD      | 0 (0%)               | 0 (0%)               | 0 (0%)              | 0 (0%)              | 0 (0%)              | 0 (0%)              | 0 (0%)             | 0 (0%)              |
| Light chain isotype | IGKC      | 102 (70.3%)          | 223 (54.4%)          | 61 (49.2%)          | 133 (66.2%)         | 183 (73.5%)         | 66 (61.1%)          | 69 (69.7%)         | 73 (43.7%)          |
|                     | IGLC      | 43 (29.7%)           | 187 (45.6%)          | 63 (50.8%)          | 68 (33.8%)          | 66 (26.5%)          | 42 (38.9%)          | 30 (30.3%)         | 94 (56.3%)          |
| Compartment         | GC B cell | 85 (58.6%)           | 248 (60.5%)          | 95 (76.6%)          | 134 (66.7%)         | 151 (60.6%)         | 68 (63%)            | 59 (59.6%)         | 82 (49.1%)          |
|                     | LNPC      | 60 (41.4%)           | 162 (39.5%)          | 29 (23.4%)          | 67 (33.3%)          | 98 (39.4%)          | 40 (37%)            | 40 (40.4%)         | 85 (50.9%)          |
| Time point          | Week 4    |                      |                      | 45 (36.3%)          |                     |                     |                     |                    |                     |
|                     | Week 5    |                      | 180 (43.9%)          |                     |                     |                     |                     |                    |                     |
|                     | Week 7    | 84 (57.9%)           | 230 (56.1%)          | 79 (63.7%)          | 142 (70.6%)         | 115 (46.2%)         | 67 (62%)            | 34 (34.3%)         | 108 (64.7%)         |
|                     | Week 15   | 61 (42.1%)           |                      |                     | 59 (29.4%)          | 134 (53.8%)         | 41 (38%)            | 65 (65.7%)         | 59 (35.3%)          |

**Extended Data Table 7. Processing of BCR and 5' gene expression data from scRNA-seq**

| Participant | Time point | Compartment | BCR                    |                         | 5' gene expression     |                         |                                |                                 |
|-------------|------------|-------------|------------------------|-------------------------|------------------------|-------------------------|--------------------------------|---------------------------------|
|             |            |             | Pre-QC number of cells | Post-QC number of cells | Pre-QC number of cells | Post-QC number of cells | Median number of UMIs per cell | Median number of genes per cell |
| 01a         | Week 4     | PB          | 6211                   | 5562                    | 8106                   | 6251                    | 14020                          | 2470                            |
|             | Week 7     | FNA         | 5637                   | 5198                    | 16493                  | 15065                   | 10069                          | 3904                            |
|             | Week 15    | FNA         | 5044                   | 4667                    | 14544                  | 13664                   | 9803                           | 3908                            |
| 02a         | Week 4     | PB          | 3981                   | 3016                    | 2847                   | 1952                    | 8589.5                         | 1967.5                          |
|             | Week 5     | FNA         | 18943                  | 16664                   | 27065                  | 24827                   | 22731                          | 8519                            |
|             | Week 7     | FNA         | 26710                  | 20982                   | 39293                  | 35052                   | 20904                          | 7936                            |
| 04          | Week 4     | PB          | 5347                   | 4321                    | 8571                   | 4486                    | 12855.5                        | 2546                            |
|             | Week 4     | FNA         | 5205                   | 4868                    | 11272                  | 10312                   | 11384                          | 4267                            |
|             | Week 7     | FNA         | 5771                   | 5142                    | 13993                  | 13063                   | 10733                          | 3926                            |
| 07          | Week 4     | PB          | 4123                   | 3610                    | 6284                   | 3745                    | 14059                          | 2602                            |
|             | Week 7     | FNA         | 7284                   | 6515                    | 14466                  | 13282                   | 10986                          | 4173                            |
|             | Week 15    | FNA         | 8343                   | 7457                    | 16367                  | 15340                   | 10717                          | 4183                            |
| 10          | Week 4     | PB          | 3228                   | 2535                    | 2336                   | 1565                    | 13046                          | 2386                            |
|             | Week 7     | FNA         | 20154                  | 18088                   | 33178                  | 30545                   | 22459.5                        | 8451                            |
|             | Week 15    | FNA         | 23419                  | 20133                   | 35386                  | 31771                   | 23104                          | 8657.5                          |
| 13          | Week 4     | PB          | 2241                   | 1897                    | 3072                   | 2258                    | 12423.5                        | 2433                            |
|             | Week 7     | FNA         | 8448                   | 7320                    | 14126                  | 13264                   | 10978                          | 4145                            |
|             | Week 15    | FNA         | 3098                   | 2716                    | 8730                   | 6927                    | 5615                           | 2186                            |
| 20          | Week 4     | PB          | 2962                   | 2175                    | 2011                   | 1346                    | 13254                          | 2343                            |
|             | Week 7     | FNA         | 5086                   | 4595                    | 15171                  | 14459                   | 10989.5                        | 3758                            |
|             | Week 15    | FNA         | 8754                   | 7739                    | 18876                  | 17299                   | 11520.5                        | 4065                            |
| 22          | Week 4     | PB          | 6517                   | 5313                    | 9504                   | 6850                    | 11730                          | 2251.5                          |
|             | Week 7     | FNA         | 9580                   | 7904                    | 22879                  | 21692                   | 9700                           | 3756                            |
|             | Week 15    | FNA         | 4780                   | 4138                    | 16233                  | 13141                   | 10014.5                        | 3802                            |

**Extended Data Table 8. Processing of BCR reads from bulk-seq**

| Participant | Time point | Compartment | Cell count | Sequence count |              |         |            |
|-------------|------------|-------------|------------|----------------|--------------|---------|------------|
|             |            |             |            | Input          | Preprocessed | Post QC | Unique VDJ |
| 01a         | Week 7     | GC B cell   | 16920      | 1234529        | 4950         | 4018    | 2510       |
|             |            | LNPC        | 3307       | 1350772        | 11799        | 9851    | 3592       |
|             | Week 15    | GC B cell   | 10440      | 1031639        | 1274         | 897     | 612        |
|             |            | LNPC        | 2139       | 1659983        | 6337         | 5348    | 2122       |
|             | Week 29    | BMPC        | 16000000   | 2224729        | 142929       | 127601  | 65389      |
|             | 02a        | Week 5      | GC B cell  | 75639          | 2323018      | 60305   | 50108      |
| LNPC        |            |             | 7983       | 2062756        | 80227        | 61617   | 14236      |
| Week 7      |            | GC B cell   | 65172      | 2264893        | 47141        | 38634   | 21203      |
|             |            | LNPC        | 8730       | 2041016        | 71862        | 54796   | 13202      |
| Week 29     |            | BMPC        | 200000     | 1132888        | 63177        | 55882   | 35438      |
| 04          |            | Week 4      | GC B cell  | 27014          | 1191023      | 3115    | 2207       |
|             | LNPC       |             | 2312       | 1012560        | 9807         | 8276    | 2955       |
|             | Week 7     | GC B cell   | 37948      | 1354770        | 16773        | 13798   | 8757       |
|             |            | LNPC        | 2495       | 917541         | 11273        | 9403    | 3361       |
|             | Week 29    | BMPC        | 200000     | 1526703        | 11664        | 10357   | 9241       |
|             | 07         | Week 7      | GC B cell  | 67030          | 1330762      | 37376   | 32737      |
| LNPC        |            |             | 7131       | 1360131        | 29602        | 21560   | 6666       |
| Week 15     |            | GC B cell   | 36501      | 1160090        | 6994         | 5377    | 3762       |
|             |            | LNPC        | 2108       | 1798209        | 19416        | 14404   | 3801       |
| Week 29     |            | BMPC        | 100000     | 1212296        | 19112        | 17647   | 14378      |
| 10          |            | Week 7      | GC B cell  | 37570          | 2771591      | 43545   | 36356      |
|             | LNPC       |             | 13131      | 2747041        | 119842       | 90279   | 20947      |
|             | Week 15    | GC B cell   | 103688     | 2599601        | 78901        | 65390   | 34232      |
|             |            | LNPC        | 15757      | 2472177        | 102827       | 77796   | 20465      |
| 13          | Week 7     | GC B cell   | 26603      | 1448419        | 13749        | 11614   | 6413       |
|             |            | LNPC        | 6798       | 1528468        | 35222        | 25799   | 6997       |
|             | Week 15    | GC B cell   | 38318      | 1424118        | 13795        | 11862   | 7757       |
|             |            | LNPC        | 3801       | 1263065        | 26314        | 19482   | 5107       |
|             | Week 29    | BMPC        | 100000     | 3206444        | 21006        | 19123   | 14894      |
|             | 20         | Week 7      | GC B cell  | 16773          | 1249336      | 10208   | 8084       |
| LNPC        |            |             | 3967       | 1248043        | 38803        | 28898   | 7185       |
| Week 15     |            | GC B cell   | 63961      | 999961         | 24525        | 20745   | 12230      |
|             |            | LNPC        | 6877       | 1324665        | 3196         | 1998    | 1323       |
| Week 29     |            | BMPC        | 200000     | 1307413        | 602          | 491     | 380        |
| 22          |            | Week 7      | GC B cell  | 17676          | 1344080      | 15060   | 12556      |
|             | LNPC       |             | 4823       | 1068783        | 26503        | 20779   | 4907       |
|             | Week 15    | GC B cell   | 48264      | 891196         | 22310        | 17775   | 8612       |
|             |            | LNPC        | 10443      | 1290422        | 28342        | 19770   | 6665       |
|             | Week 29    | BMPC        | 200000     | 2185196        | 115201       | 105375  | 64106      |
